# Supplementary material
Source: publisher site journal article supplement (https://natureconservation.pensoft.net/article/19809/download/suppl/31/)
Supplement: Supplementary file 1

Aditional file 1. Characteristics of the 6 polymorphic microsatellites markers developed for *Cistus laurifolius*. In bold, markers used for population genetics parameters estimates.

| Locus name | Primers sequence 5'-3' | Repeated motif | K | Allele size range (bp) | Total no. of alleles | GenBank accession no. |
| --- | --- | --- | --- | --- | --- | --- |
| **cislau1** | **fw:TCGATCGGGTGAAAACAAAT**  **rv: TTCCTTCCAGAGGCTTCTCA** | **(TC)5** | **4** | **227-255** | **7** | **JX946279** |
| cislau5 | fw:ACTCATTAATTAGGTTGTTGAATGG  rv: ATGATGCTTGGCTAGTTTATCC | (AT)7 | 4 | 318-320 | 2 | JX946280 |
| **cislau7** | **fw:TCAAAAGCTTCTTCCCCTCT**  **rv: GATGTATGATGAAGGGCAGG** | **(AT)7** | **4** | **158-166** | **5** | **JX946281** |
| **cislau11** | **fw:GCGAGATCCCGAAACACT**  **rv: AAAAACCCTAGAAGTCCTCGA** | **(TC)5** | **3** | **163-167** | **3** | **JX946282** |
| **cislau12** | **fw:TAATTGTCGCTTTGCTGTGC**  **rv: TCATGCACAAGTTGAATCAAGA** | **(AT)7** | **10** | **202-232** | **15** | **JX946283** |
| **cislau14** | **fw:GACAACTCACACGACTCTAAACG**  **rv: AAATTGGGCATGGACCAAG** | **(AAAG)4** | **5** | **180-184** | **2** | **JX946284** |
